# Supplementary material for: Bioavailability of Dietary Zinc Sources and Their Effect on Mineral and Antioxidant Status in Lambs
Source: MDPI journal article supplement (doi:10.3390/agriculture11111093), 2021-11-04
Supplement: s1 [file s1]

**Table S1.** Trace mineral concentrations in plasma after 30, 60 and 90 days of Zn supplementation (80 mg Zn/kg).

| Parameters |    | Dietary treatments <sup>1</sup> |                   |       |        | SEM    | <i>P</i> -value <sup>2</sup> |         |        |
|------------|----|---------------------------------|-------------------|-------|--------|--------|------------------------------|---------|--------|
|            |    | C                               | ZnSO <sub>4</sub> | ZnGly | ZnProt |        | Zn                           | Period  | Zn x P |
| Zn, mg/L   |    |                                 |                   |       |        |        |                              |         |        |
| Day        | 0  | 0.813                           | 0.837             | 0.913 | 0.922  | 0.0241 | 0.0163                       | <0.0001 | 0.8682 |
|            | 30 | 0.895                           | 0.958             | 1.000 | 1.007  | 0.0183 |                              |         |        |
|            | 60 | 0.892                           | 0.948             | 0.962 | 0.924  | 0.0205 |                              |         |        |
|            | 90 | 0.895                           | 0.952             | 1.079 | 1.052  | 0.0174 |                              |         |        |
| Cu, mg/L   |    |                                 |                   |       |        |        |                              |         |        |
| Day        | 0  | 0.653                           | 0.672             | 0.677 | 0.612  | 0.0276 | 0.9147                       | <0.0001 | 0.0754 |
|            | 30 | 0.668                           | 0.608             | 0.683 | 0.743  | 0.0296 |                              |         |        |
|            | 60 | 0.797                           | 0.768             | 0.775 | 0.725  | 0.0205 |                              |         |        |
|            | 90 | 0.625                           | 0.663             | 0.653 | 0.602  | 0.0176 |                              |         |        |
| Fe, mg/L   |    |                                 |                   |       |        |        |                              |         |        |
| Day        | 0  | 1.668                           | 1.913             | 1.692 | 1.873  | 0.0535 | 0.9403                       | <0.0001 | 0.8316 |
|            | 30 | 1.795                           | 1.738             | 1.828 | 1.800  | 0.0557 |                              |         |        |
|            | 60 | 2.777                           | 2.720             | 2.802 | 2.683  | 0.0956 |                              |         |        |
|            | 90 | 2.455                           | 2.527             | 2.347 | 2.602  | 0.0710 |                              |         |        |

<sup>1</sup>C: basal diet, ZnSO<sub>4</sub>: zinc sulphate, ZnGly: zinc chelate of glycine hydrate, ZnProt: zinc chelate of protein hydrolysate

<sup>2</sup>Values (n = 6/treatment) are presented as least-squares means.

Data were analyzed using two-way repeated measures ANOVA with the Geisser-Greenhouse correction, followed by the post hoc Tukey's multiple comparisons test, included the effects for treatment, period and their interaction.
